# Supplementary material for: The Great Silk Alternative: Multiple Co-Evolution of Web Loss and Sticky Hairs in Spiders
Source: PubMed Central journal article supplement (PMC3641104; doi:10.1371/journal.pone.0062682), 2013-05-01

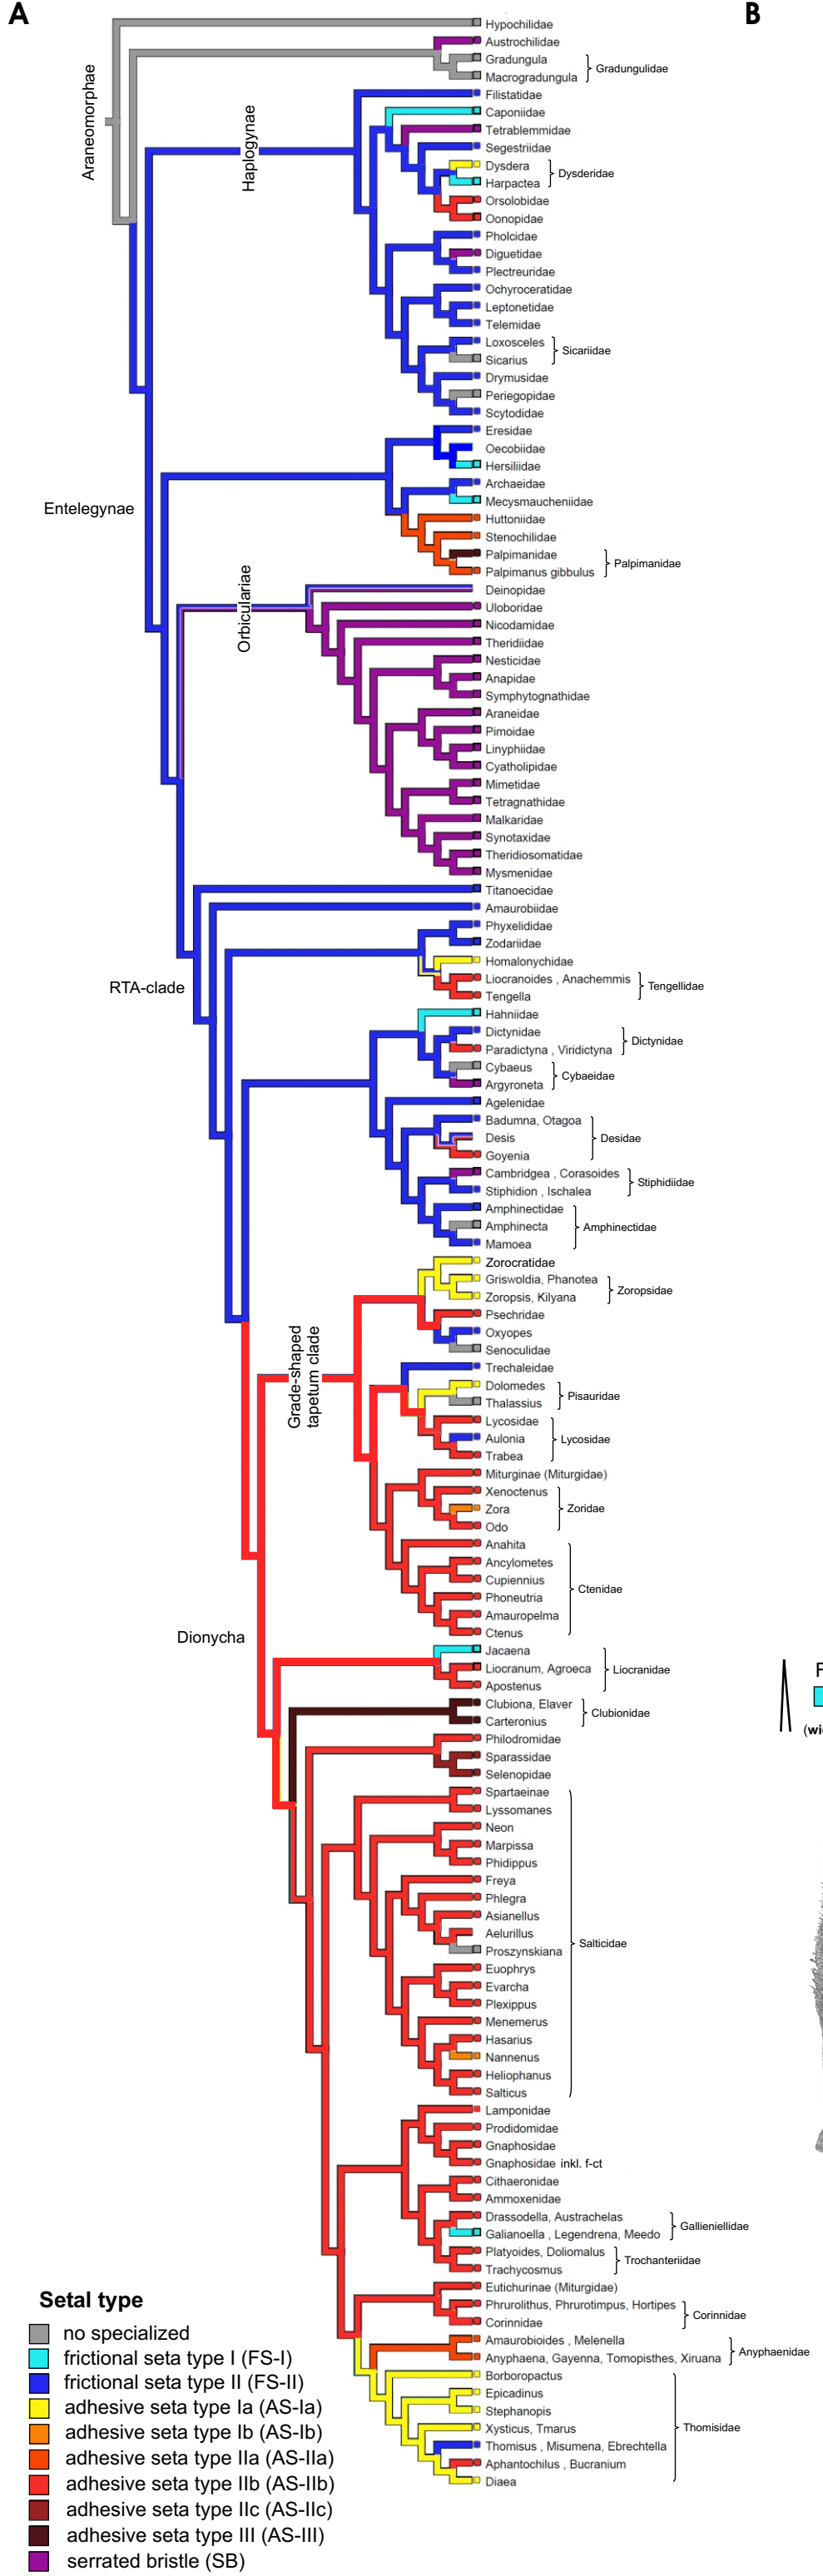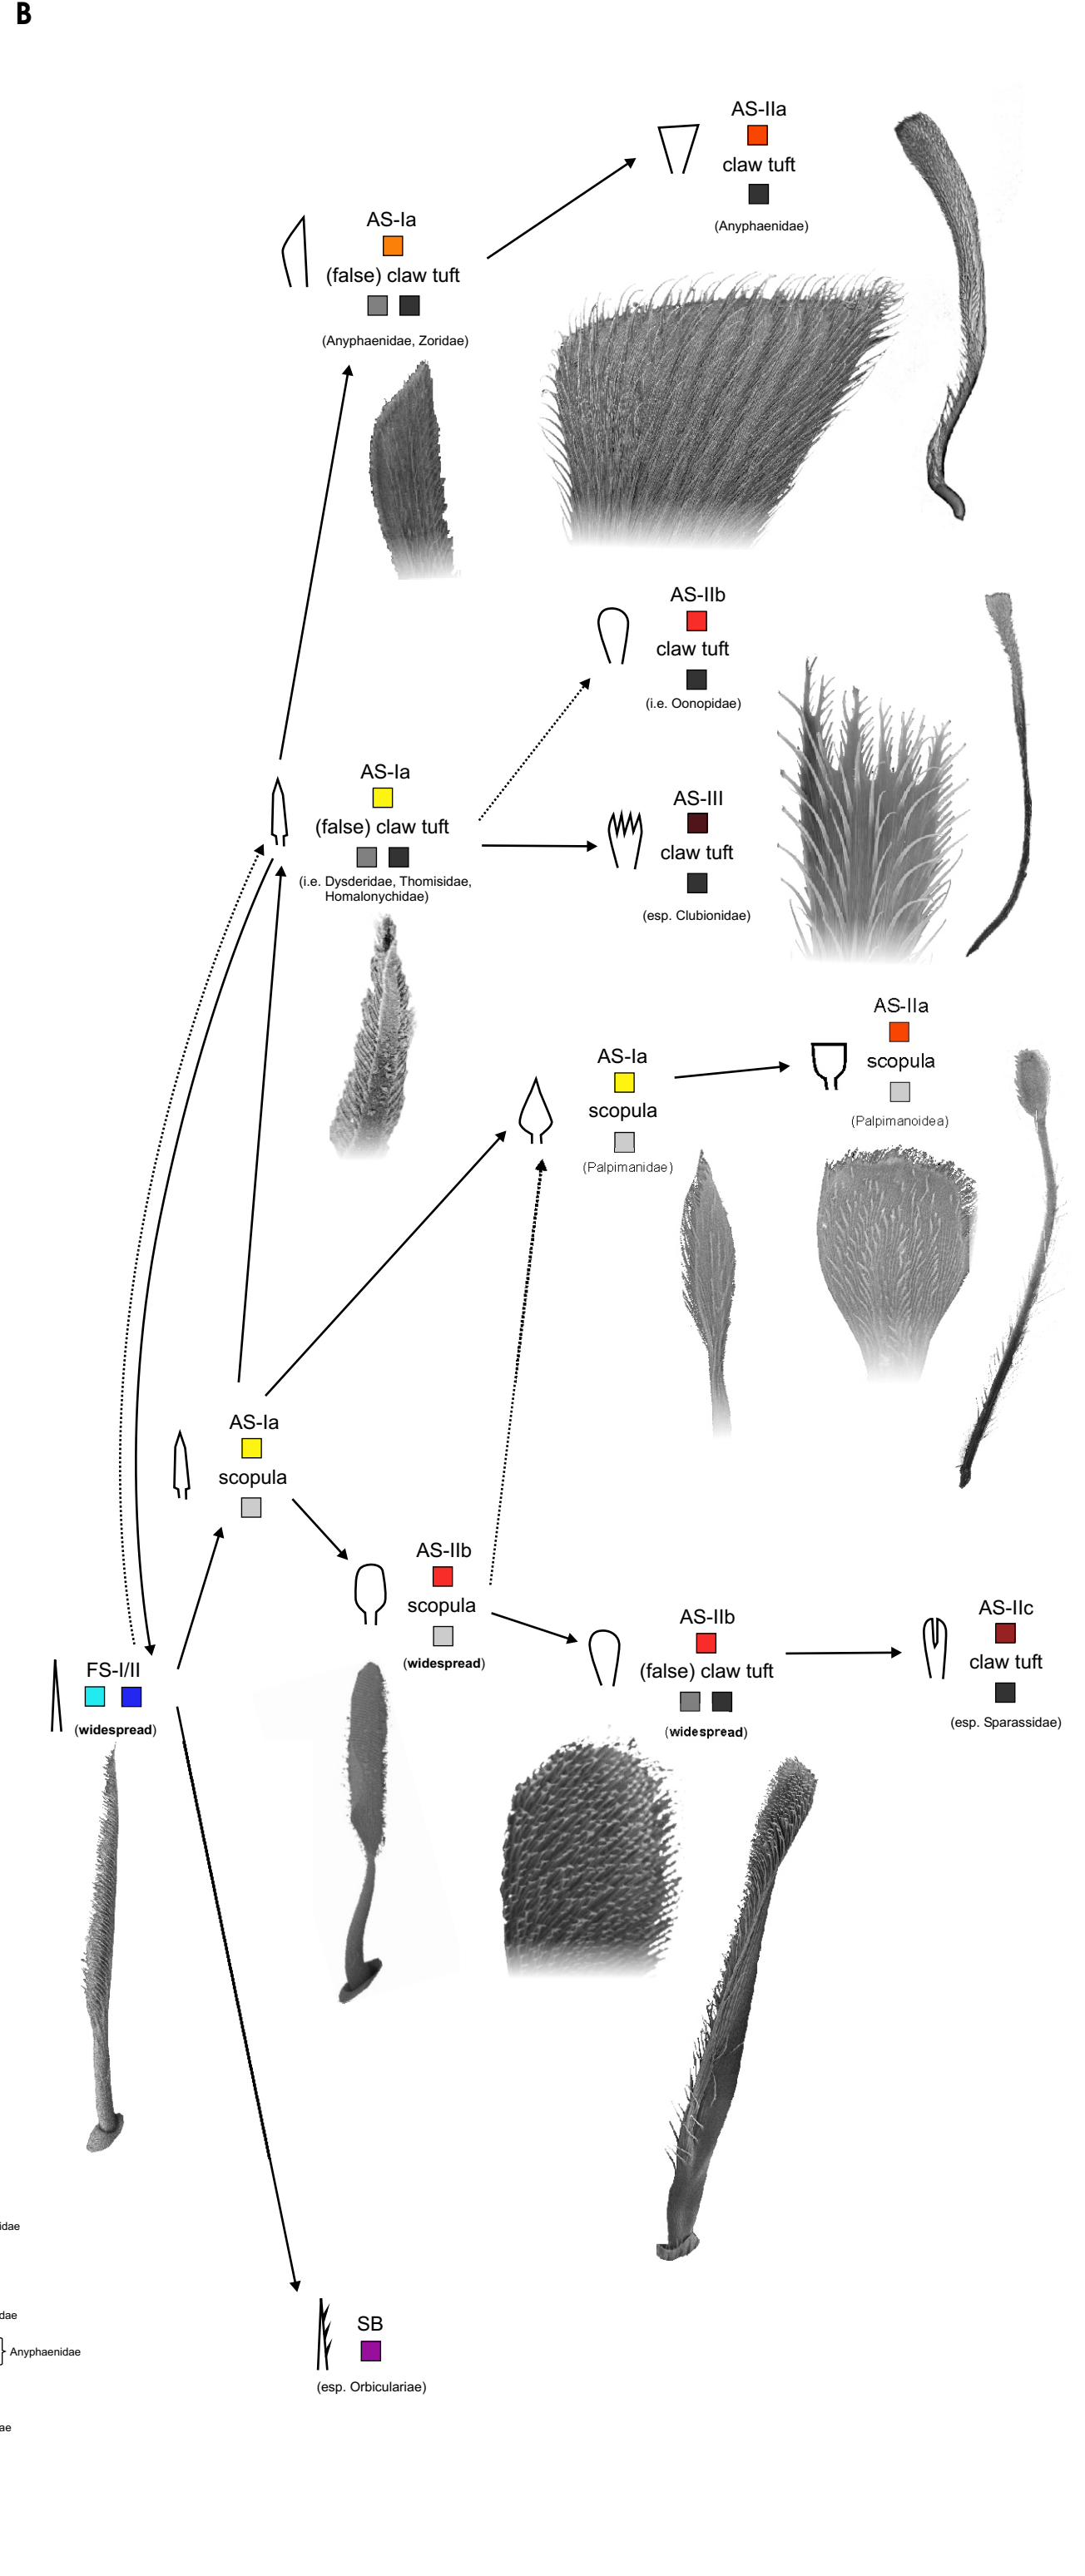

Supplement: pone.0062682.s002.pdf [file pone.0062682.s002.pdf]
